# Supplementary material for: A green emissive amorphous fac-Alq3 solid generated by grinding crystalline blue fac-Alq3 powder
Source: Royal Society of Chemistry journal article supplement (doi:10.1039/c1cc00060h), 2011-01-01
Supplement: c1cc00060h.pdf [file c1cc00060h.pdf]

## Supporting Information for

# Green Emissive Amorphous *fac*-Alq<sub>3</sub> Solid Generated by Grinding Crystalline Blue *fac*-Alq<sub>3</sub> Powder

Hai Bi, Dong Chen, Di Li, Yang Yuan, Dandan Xia, Zuolun Zhang, Hongyu Zhang,\* and  
Yue Wang\*

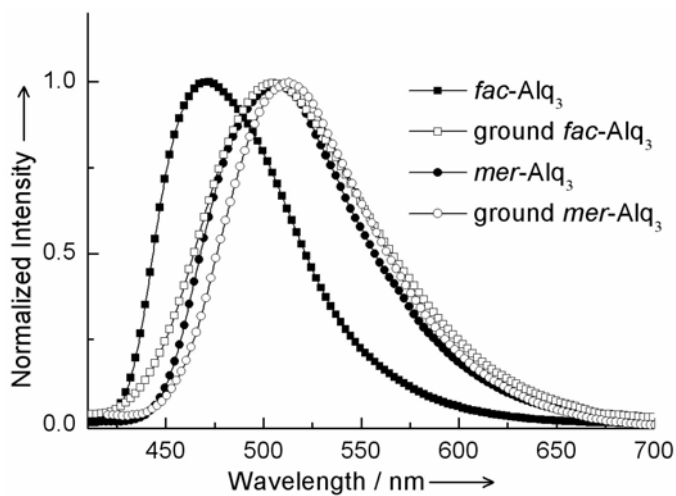

**Fig S1.** Fluorescent spectra of *fac*-Alq<sub>3</sub> ( $\delta$  phase), *mer*-Alq<sub>3</sub> ( $\alpha$  phase) and their corresponding ground samples.

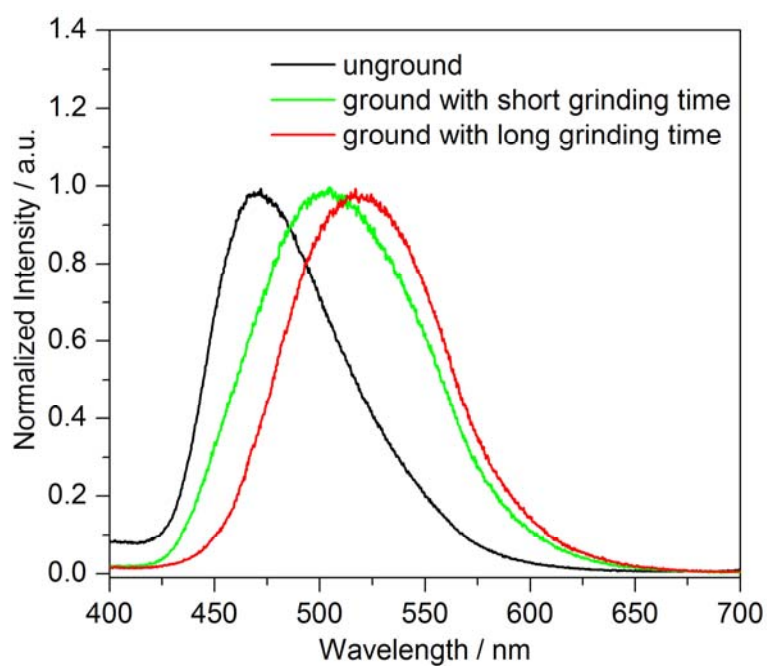

**Fig. S2.** Emission spectra of the unground *fac*-Alq<sub>3</sub> and ground *fac*-Alq<sub>3</sub> with short or long grinding time.

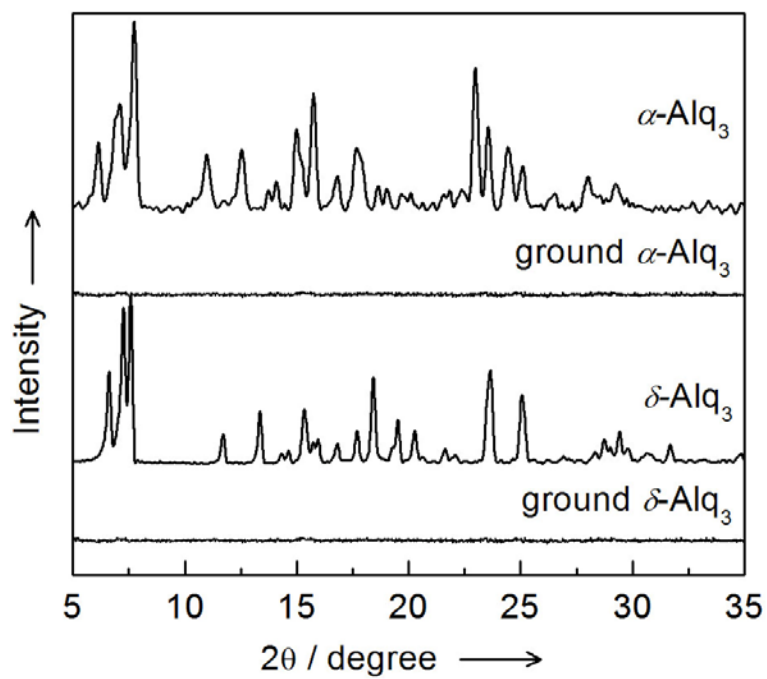

**Fig. S3.** X-ray diffraction patterns of Alq<sub>3</sub> in various states.

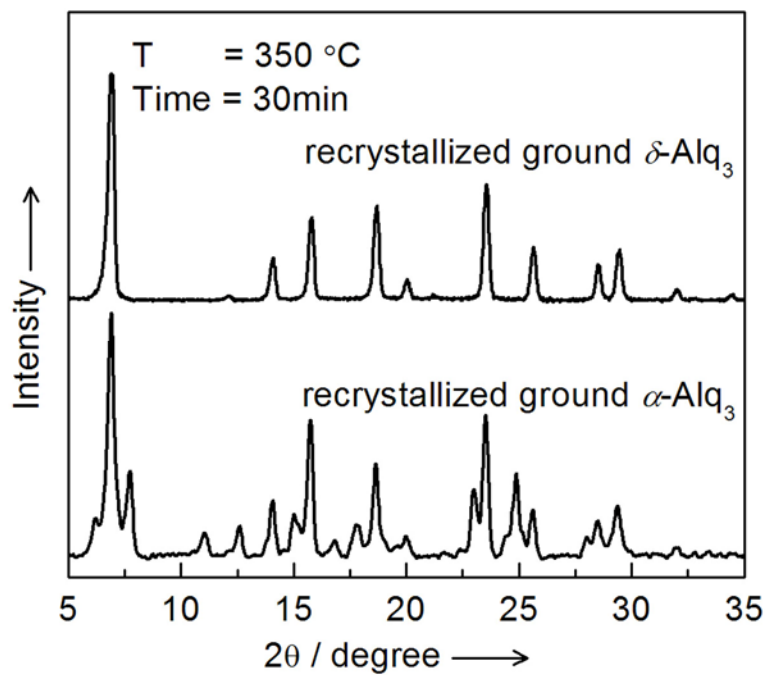

**Fig. S4.** X-ray diffraction patterns of recrystallized ground  $\alpha$ - and  $\delta$ -Alq<sub>3</sub> solids.

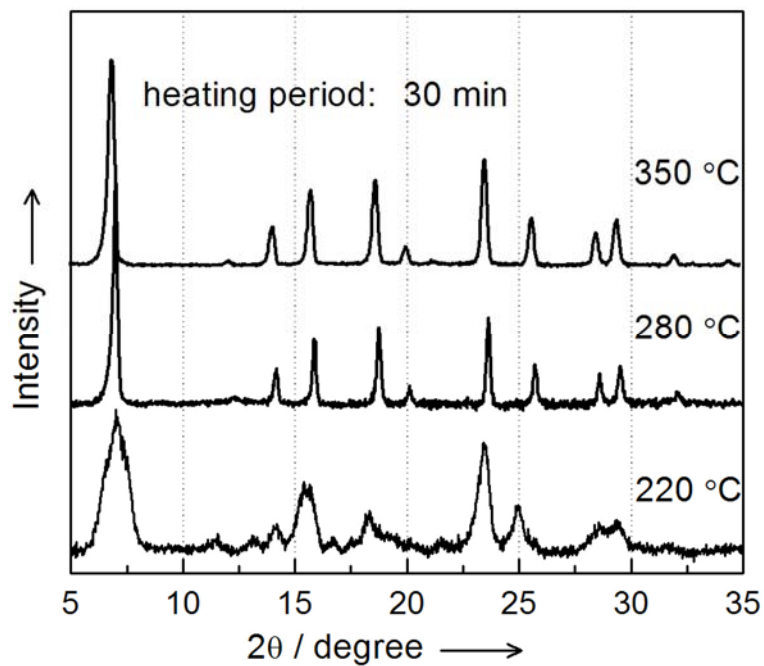

**Fig. S5.** X-ray diffraction patterns of recrystallized ground  $\delta$ -Alq<sub>3</sub> solid.

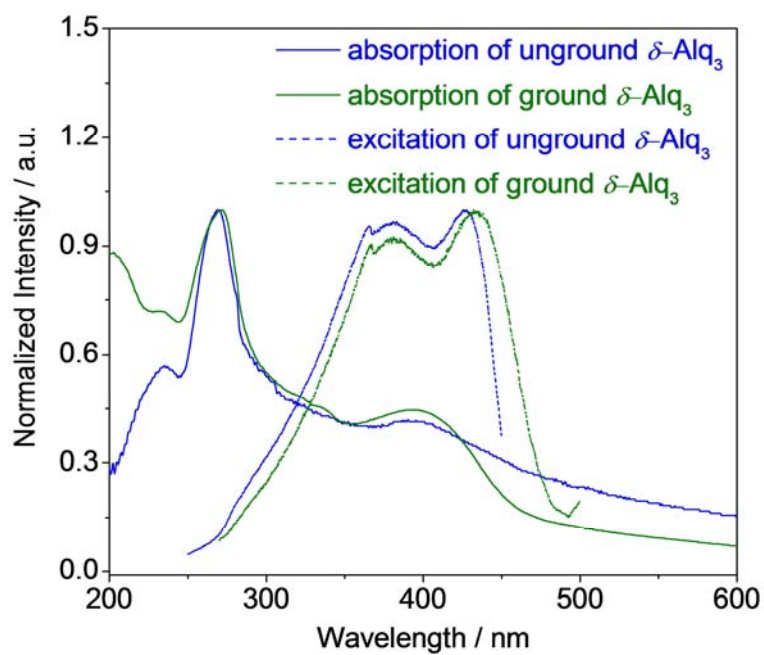

**Fig. S6.** Absorption and fluorescence excitation spectra of the ground and unground  $\delta$ -Alq<sub>3</sub>.

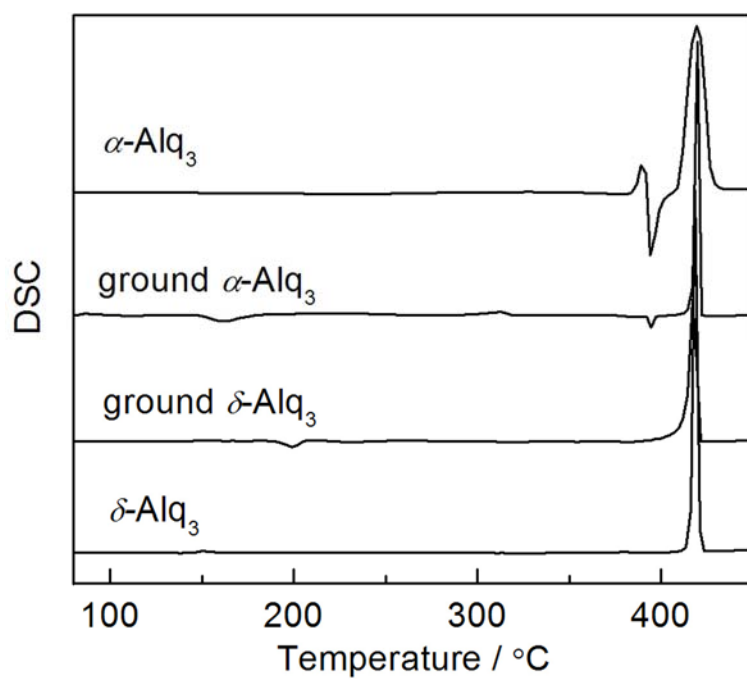

**Fig. S7.** DSC traces of Alq<sub>3</sub> in various states.
